# Supplementary material
Source: publisher figshare collection journal article supplement (https://tandf.figshare.com/ndownloader/files/15008576)
Supplement: Supplementary file 1 [file 15008576]

**Online supplement for: “Low body mass index is associated with higher odds of COPD and lower lung function in low- and middle-income countries”**

**Authors:** Matthew R Grigsby, Trishul Siddharthan, Suzanne L Pollard, Muhammad Chowdhury, Adolfo Rubinstein, J Jaime Miranda, Antonio Bernabe-Ortiz, Dewan Alam, Bruce Kirenga, Rupert Jones, Frederick van Gemert, and William Checkley.

**Table E1: Two-by-two contingency tables of the association between having BMI < 19.8 kg/m<sup>2</sup> and COPD when using the Global Lung Function Initiative 2012 Mixed Ethnic reference population.** Fisher exact odds ratios (OR) and 95% confidence interval calculations were calculated per site, while the overall estimate and 95% confidence interval was calculated using the Cochran-Mantel-Haenszel (MH) chi-squared test. COPD was defined as having FEV<sub>1</sub>/FVC ≤ 5<sup>th</sup> percentile (lower limit of normal) based on the Global Lung Function Initiative 2012 mixed ethnic reference populations.

| Site       | BMI < 19.8 kg/m <sup>2</sup> , COPD –ve | BMI < 19.8 kg/m <sup>2</sup> , COPD +ve | BMI ≥ 19.8 kg/m <sup>2</sup> , COPD –ve | BMI ≥ 19.8 kg/m <sup>2</sup> , COPD +ve | Fisher exact OR | Exact 95% CI  |
|------------|-----------------------------------------|-----------------------------------------|-----------------------------------------|-----------------------------------------|-----------------|---------------|
| Bariloche  | 22                                      | 5                                       | 999                                     | 73                                      | 3.11            | (0.89, 8.74)  |
| Canelones  | 11                                      | 12                                      | 761                                     | 67                                      | 12.3            | (4.77, 32.1)  |
| Dhaka      | 213                                     | 61                                      | 1,297                                   | 101                                     | 3.67            | (2.54, 5.28)  |
| Kampala    | 57                                      | 4                                       | 529                                     | 6                                       | 6.15            | (1.24, 26.8)  |
| Lima       | 6                                       | 3                                       | 935                                     | 53                                      | 8.77            | (1.38, 42.47) |
| Marcos Paz | 12                                      | 5                                       | 1,053                                   | 166                                     | 2.64            | (0.72, 8.18)  |
| Masindi    | 72                                      | 16                                      | 278                                     | 48                                      | 1.29            | (0.64, 2.47)  |
| Matlab     | 682                                     | 186                                     | 863                                     | 93                                      | 2.53            | (1.92, 3.35)  |
| Nakaseke   | 86                                      | 17                                      | 582                                     | 36                                      | 3.19            | (1.61, 6.13)  |
| Rural Puno | 18                                      | 6                                       | 438                                     | 38                                      | 3.83            | (1.17, 10.8)  |
| Temuco     | 10                                      | 2                                       | 974                                     | 52                                      | 3.74            | (0.39, 18.2)  |
| Tumbes     | 16                                      | 2                                       | 913                                     | 14                                      | 8.10            | (0.83, 40.2)  |
| Urban Puno | 8                                       | 1                                       | 470                                     | 24                                      | 2.44            | (0.05, 19.5)  |

**Table E2: Two-by-two contingency tables of the association between having BMI < 19.8 kg/m<sup>2</sup> and COPD when using the Global Lung Function Initiative 2012 Caucasian reference population.** Fisher exact odds ratios (OR) and 95% confidence interval calculations were calculated per site, while the overall estimate and 95% confidence interval was calculated using the Cochran-Mantel-Haenszel (MH) chi-squared test. COPD was defined as having FEV<sub>1</sub>/FVC ≤ 5<sup>th</sup> percentile (lower limit of normal) based on the Global Lung Function Initiative 2012 mixed ethnic reference populations.

| Site       | BMI < 19.8 kg/m <sup>2</sup> ,<br>COPD -ve | BMI < 19.8 kg/m <sup>2</sup> ,<br>COPD +ve | BMI ≥ 19.8 kg/m <sup>2</sup> ,<br>COPD -ve | BMI ≥ 19.8 kg/m <sup>2</sup> ,<br>COPD +ve | Fisher exact<br>OR | Exact 95% CI |
|------------|--------------------------------------------|--------------------------------------------|--------------------------------------------|--------------------------------------------|--------------------|--------------|
| Bariloche  | 23                                         | 4                                          | 1,019                                      | 53                                         | 3.34               | (0.81, 10.3) |
| Canelones  | 13                                         | 10                                         | 771                                        | 57                                         | 10.3               | (3.88, 26.8) |
| Dhaka      | 217                                        | 57                                         | 1,308                                      | 90                                         | 3.81               | (2.6, 5.55)  |
| Kampala    | 57                                         | 4                                          | 530                                        | 5                                          | 7.39               | (1.42, 35.5) |
| Lima       | 7                                          | 2                                          | 953                                        | 35                                         | 7.74               | (0.76, 42.7) |
| Marcos Paz | 12                                         | 5                                          | 1,083                                      | 136                                        | 3.31               | (0.9, 10.3)  |
| Masindi    | 77                                         | 11                                         | 290                                        | 36                                         | 1.15               | (0.5, 2.44)  |
| Matlab     | 699                                        | 169                                        | 874                                        | 82                                         | 2.58               | (1.93, 3.46) |
| Nakaseke   | 89                                         | 14                                         | 589                                        | 29                                         | 3.19               | (1.5, 6.52)  |
| Rural Puno | 19                                         | 5                                          | 453                                        | 23                                         | 5.15               | (1.38, 16.0) |
| Temuco     | 10                                         | 2                                          | 987                                        | 39                                         | 5.04               | (0.52, 24.9) |
| Tumbes     | 16                                         | 2                                          | 921                                        | 6                                          | 18.9               | (1.74, 117)  |
| Urban Puno | 8                                          | 1                                          | 475                                        | 19                                         | 3.11               | (0.07, 25.3) |

**Table E3: Odds ratios of having COPD for different risk factors.** Multivariable logistic regression was used to calculate adjusted odds ratios. This is a single model using the WHO BMI categories with normal weight (18.5-24.9 kg/m<sup>2</sup>) as the reference.

| Variable                                       | OR   | 95% CI      |
|------------------------------------------------|------|-------------|
| BMI ≥30 vs. 18.5-24.9 kg/m <sup>2</sup>        | 0.56 | 0.45 - 0.71 |
| BMI 25-29.9 vs. 18.5-24.9 kg/m <sup>2</sup>    | 0.75 | 0.67 - 0.84 |
| BMI <18.5 vs. 18.5-24.9 kg/m <sup>2</sup>      | 2.13 | 1.81 - 2.51 |
| Women vs. Men                                  | 0.81 | 0.49 - 1.33 |
| Age in years                                   | 1.03 | 1.02 - 1.04 |
| Daily smoking                                  | 2.22 | 1.86 - 2.64 |
| Biomass fuel as the primary source for cooking | 1.41 | 1.19 - 1.69 |
| Completed secondary education or higher        | 0.88 | 0.70 - 1.10 |
| Post-treatment pulmonary tuberculosis          | 3.62 | 2.75 - 4.76 |

**Table E4: Odds ratios (OR) for having COPD among participants with BMI < 19.8 kg/m<sup>2</sup> when compared to those with BMI ≥ 19.8 kg/m<sup>2</sup>, stratified by which site was left out of the analysis.** The alternating logistic regressions (ALR) approach was used to calculate adjusted odds ratios accounting for clustering and Cochran-Mantel-Haenszel (MH) chi-squared tests for count data were used to calculate the common odds ratio to investigate the possibility of a single site having heavy influence on the overall primary outcome. ALR models were adjusted for age, sex, daily cigarette smoking, biomass, previous pulmonary tuberculosis and secondary education.

| Site removed | OR <sub>ALR</sub> | 95% CI      | OR <sub>MH</sub> | 95% CI      |
|--------------|-------------------|-------------|------------------|-------------|
| Bariloche    | 2.27              | 1.82 - 2.84 | 2.89             | 2.42 - 3.45 |
| Canelones    | 2.16              | 1.82 - 2.55 | 2.77             | 2.32 - 3.31 |
| Dhaka        | 2.24              | 1.73 - 2.90 | 2.71             | 2.22 - 3.31 |
| Kampala      | 2.28              | 1.83 - 2.84 | 2.87             | 2.40 - 3.42 |
| Lima         | 2.26              | 1.81 - 2.81 | 2.87             | 2.40 - 3.42 |
| Marcos Paz   | 2.28              | 1.80 - 2.90 | 2.90             | 2.43 - 3.46 |
| Masindi      | 2.41              | 1.86 - 3.12 | 3.12             | 2.60 - 3.75 |
| Matlab       | 2.54              | 1.90 - 3.40 | 3.28             | 2.62 - 4.10 |
| Nakaseke     | 2.30              | 1.80 - 2.95 | 2.87             | 2.40 - 3.45 |
| Rural Puno   | 2.26              | 1.80 - 2.85 | 2.88             | 2.41 - 3.43 |
| Temuco       | 2.25              | 1.81 - 2.81 | 2.89             | 2.42 - 3.44 |
| Tumbes       | 2.26              | 1.83 - 2.79 | 2.88             | 2.41 - 3.43 |
| Urban Puno   | 2.29              | 1.82 - 2.87 | 2.90             | 2.43 - 3.45 |

**Table E5: Site-specific odds ratios for having COPD among participants with BMI < 19.8 kg/m<sup>2</sup> compared to those with BMI ≥ 19.8 kg/m<sup>2</sup>.** Multivariable logistic regression was used to calculate adjusted odds ratios. All models were adjusted for age, sex, daily cigarette smoking, biomass, previous pulmonary tuberculosis and secondary education.

| Site       | OR   | 95% CI      |
|------------|------|-------------|
| Canelones  | 9.21 | 3.74 - 22.7 |
| Lima       | 7.56 | 1.72 - 33.3 |
| Matlab     | 1.84 | 1.38 - 2.45 |
| Dhaka      | 1.91 | 1.28 - 2.84 |
| Tumbes     | 6.50 | 1.26 - 33.4 |
| Bariloche  | 3.41 | 1.16 - 9.98 |
| Kampala    | 4.61 | 1.09 - 19.5 |
| Rural Puno | 2.96 | 1.08 - 8.17 |
| Nakaseke   | 2.10 | 1.06 - 4.16 |
| Marcos Paz | 2.37 | 0.74 - 7.61 |
| Masindi    | 1.15 | 0.60 - 2.19 |
| Temuco     | 2.07 | 0.35 - 12.1 |
| Urban Puno | 3.03 | 0.30 - 30.8 |

**Figure E1: Body mass index categories vs. prevalence of COPD, stratified by sex.** Body mass index categories were calculated per World Health Organization guidelines as underweight ( $<18.5 \text{ kg/m}^2$ ), normal ( $18.5\text{-}25 \text{ kg/m}^2$ ), overweight ( $25\text{-}30 \text{ kg/m}^2$ ), and obese ( $30+ \text{ kg/m}^2$ ).

**Figure E2: Body mass index (BMI) cutoff vs. area under receiver operating curve (AUC) at each cutoff point used.** Estimates were calculated by defining the BMI cutoff, fitting an adjusted logistic mixed-effects model with intercept by site and COPD as the outcome, and then calculating the corresponding AUC using predicted probabilities from said model. Cutoffs were made in  $0.05 \text{ kg/m}^2$  increments between the range of 18 to  $25 \text{ kg/m}^2$ . All models were adjusted for age, sex, daily cigarette smoking, level of education completed, and previous pulmonary tuberculosis. A smoothed line with 95% CI was fitted to the resulting AUC points using local polynomial regression fitting.

**Figure E3: Body mass index vs. pre-bronchodilator fitted values for FEV<sub>1</sub>, FVC, and FEV<sub>1</sub>/FVC z-scores. Overall and stratified by site.** The solid black lines represent the fitted values curves while the diamonds represent the crude binned estimates. Fitted values were calculated from individual models for FEV<sub>1</sub>, FVC, and FEV<sub>1</sub>/FVC z-scores. The overall curves were plotted along with the site-specific deviations (random effects) for comparison with crude binned estimates (diamonds). The three regression models (i.e. FEV<sub>1</sub>, FVC, and FEV<sub>1</sub>/FVC z-scores) were adjusted for age, sex, daily cigarette smoking, level of education completed, and previous pulmonary tuberculosis.

**Figure E4: Body mass index (BMI) cutoff vs. normalized mean squared error (nMSE) at each cutoff point used, stratified by including COPD positive participants (left facet) and excluding COPD positive participants (right facet).** Estimates were calculated by defining the BMI cutoff, fitting an adjusted linear mixed-effects model with intercept by site and FEV<sub>1</sub>/FVC as the outcome, and then calculating the corresponding nMSE using predicted values from said model. Cutoffs were made in  $0.05 \text{ kg/m}^2$  increments between the range of 18 to  $25 \text{ kg/m}^2$ . All models were adjusted for age, sex, daily cigarette smoking, level of education completed, and previous pulmonary tuberculosis. A smoothed line with 95% CI was fitted to the resulting nMSE points using local polynomial regression fitting.

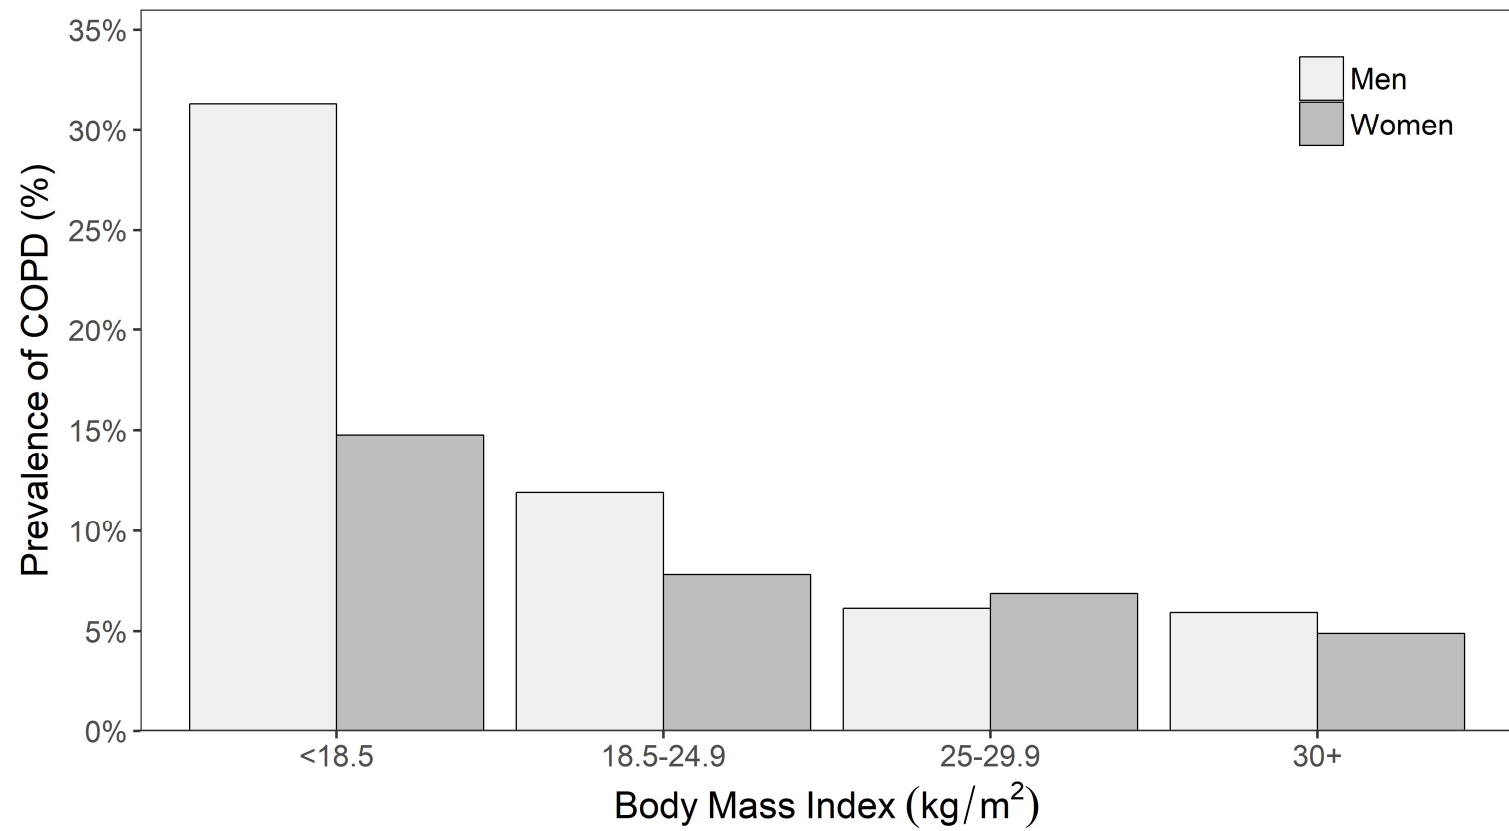

**Figure E1**



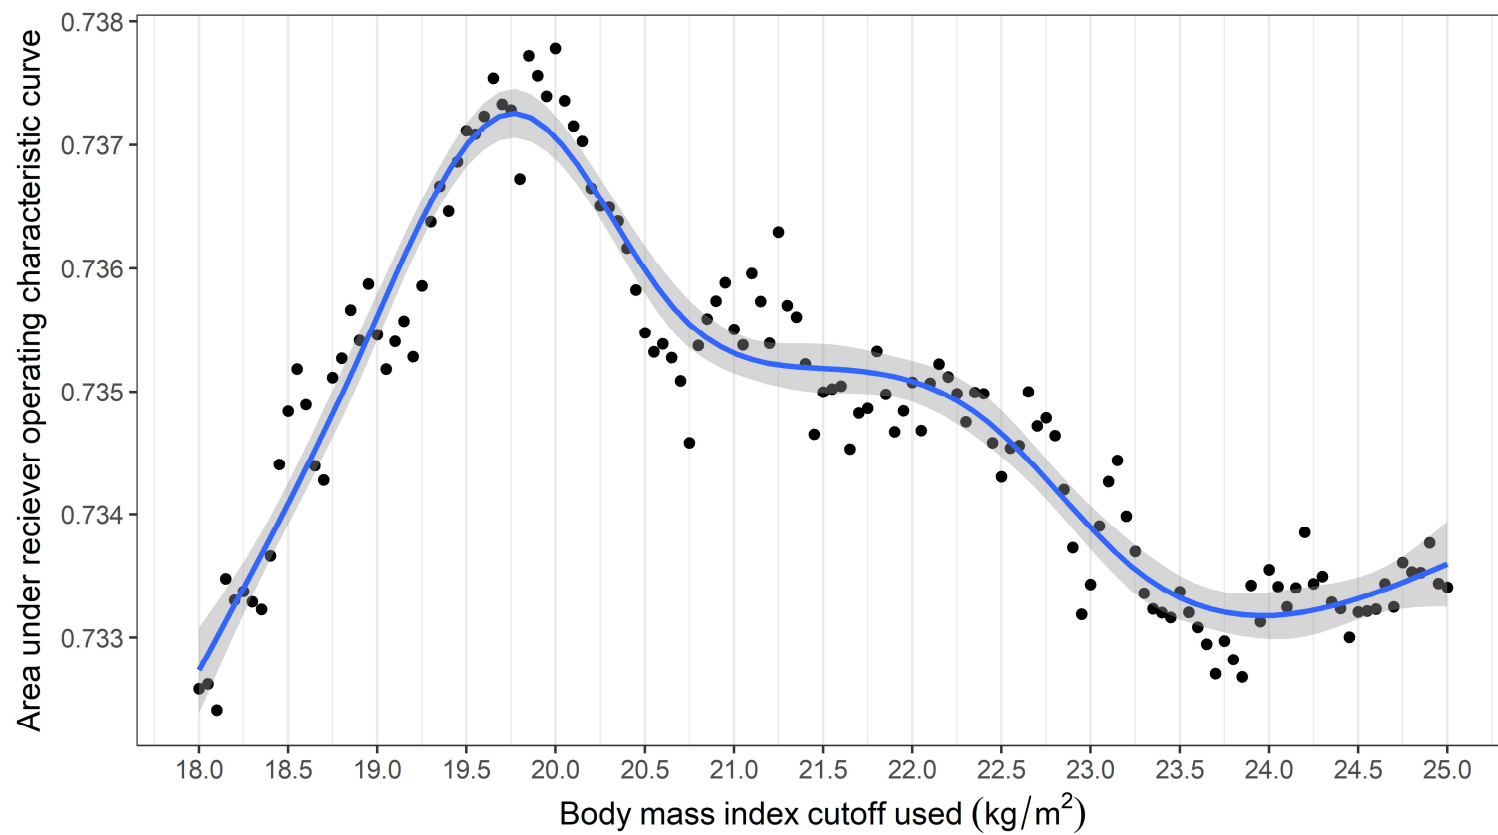

**Figure E2**

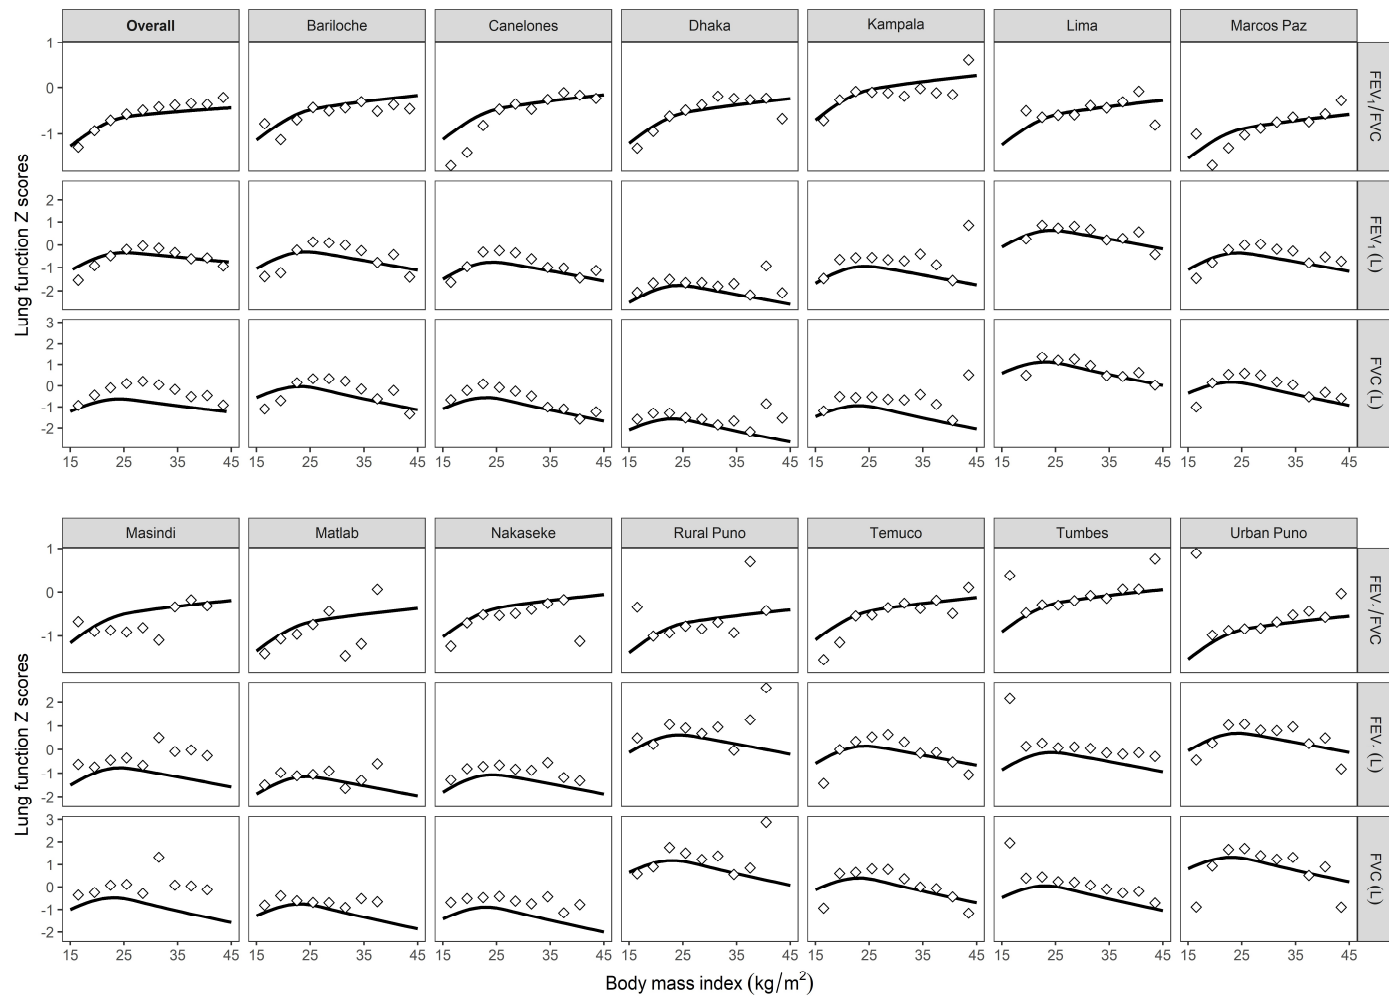

**Figure E3**

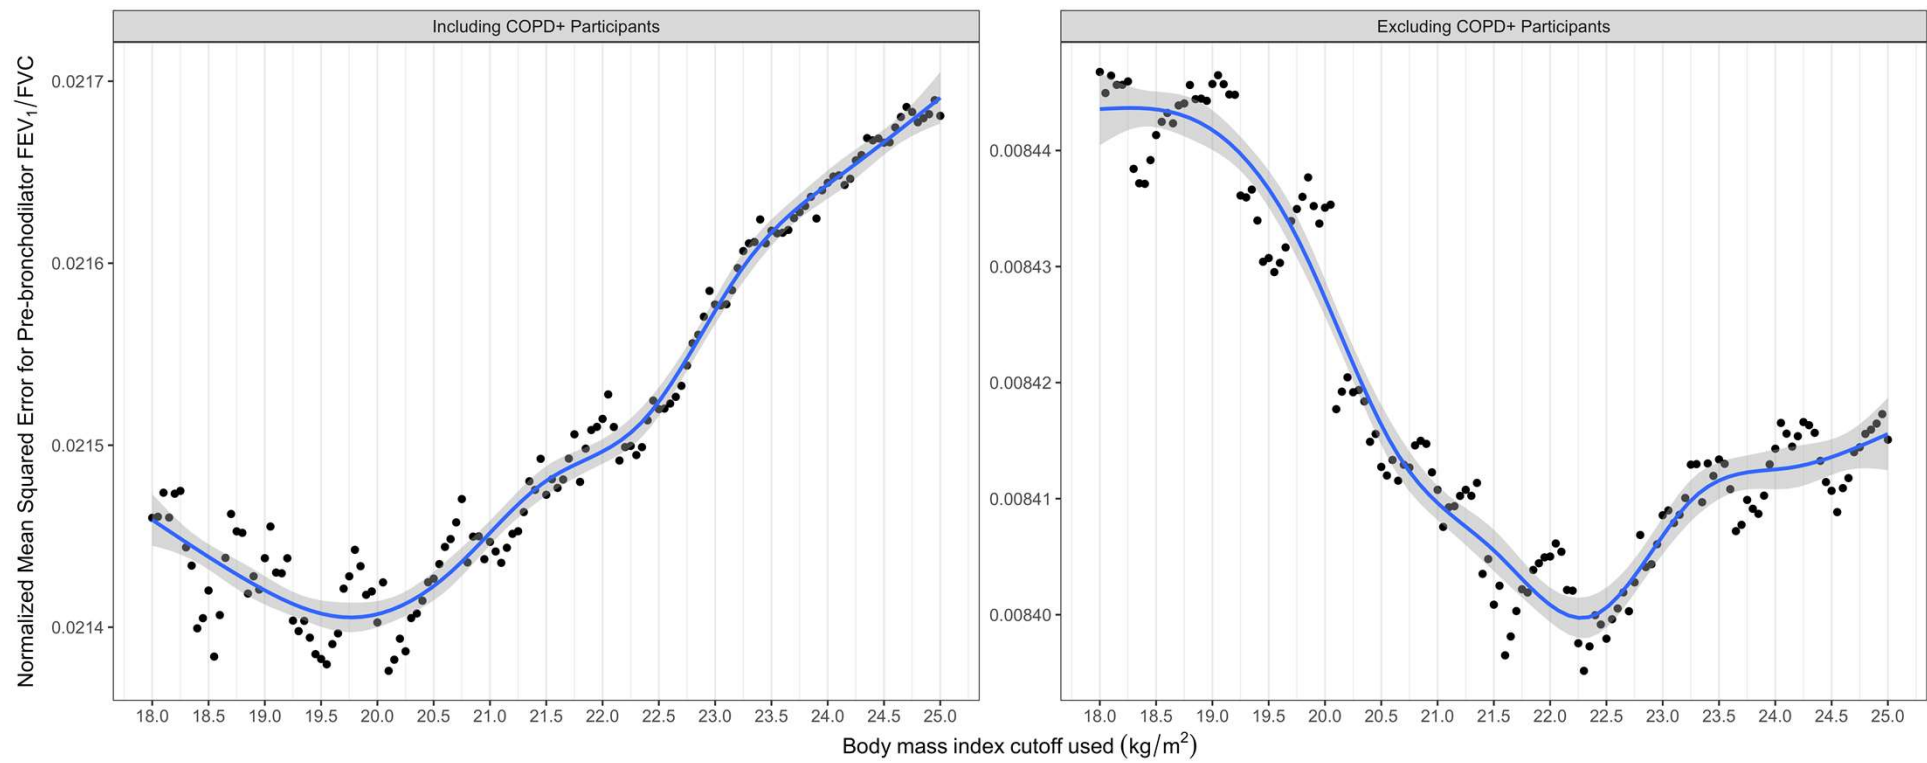

**Figure E4**
